# Supplementary material for: Pancreatic stellate cells activated by mutant KRAS-mediated PAI-1 upregulation foster pancreatic cancer progression via IL-8
Source: PubMed Central journal article supplement (PMC6831292; doi:10.7150/thno.36830), 2019-09-23
Supplement: thnov09p7168s1.pdf [file thnov09p7168s1.pdf]

**Supplementary Table S1. Clinical parameters of pancreatic cancer patients in TMAs**

| <b>Variable</b>           | <b>No. of Patients (%)</b> |
|---------------------------|----------------------------|
| <b>Sex</b>                |                            |
| Men                       | 60 (65.9)                  |
| Women                     | 31 (34.1)                  |
| <b>Age</b>                |                            |
| ≤65                       | 46 (50.5)                  |
| >65                       | 45 (49.5)                  |
| <b>Tumor location</b>     |                            |
| Head                      | 55 (60.4)                  |
| Neck                      | 7 (7.7)                    |
| Body/tail                 | 16 (17.6)                  |
| Uncinate process          | 13 (14.3)                  |
| <b>Tumor size, cm</b>     |                            |
| ≤3                        | 48 (52.7)                  |
| >3                        | 43 (47.3)                  |
| <b>Margin status</b>      |                            |
| R0                        | 64 (70.3)                  |
| R1                        | 23 (25.3)                  |
| R2                        | 4 (4.4)                    |
| <b>Tumor grade</b>        |                            |
| Poorly differentiated     | 17 (18.7)                  |
| Moderately differentiated | 50 (54.9)                  |
| Well differentiated       | 24 (26.4)                  |
| <b>Stage</b>              |                            |
| I                         | 11 (12.1)                  |
| II                        | 74 (81.3)                  |
| III                       | 4 (4.4)                    |
| IV                        | 2 (2.2)                    |
| <b>Recurrence status</b>  |                            |
| Yes                       | 61 (67.0)                  |
| No                        | 30 (33.0)                  |
| <b>Metastasis status</b>  |                            |
| Yes                       | 68 (74.7)                  |
| No                        | 23 (25.3)                  |
| <b>Lymph node status</b>  |                            |
| Negative                  | 44 (48.4)                  |
| Positive                  | 47 (51.6)                  |
| <b>Adjuvant therapy</b>   |                            |
| Yes                       | 37 (40.7)                  |
| No                        | 54 (59.3)                  |
| <b>CA19-9, U/mL</b>       |                            |
| ≤37                       | 19 (20.9)                  |
| >37                       | 72 (79.1)                  |
